# Supplementary material for: Hysteretic spin crossover in a Hofmann-type metal–organic framework constructed from a [MoIII(CN)7]4− unit
Source: Royal Society of Chemistry journal article supplement (doi:10.1039/d4qi01064g), 2024-01-01
Supplement: d4qi01064g1.pdf [file d4qi01064g1.pdf]

**Supporting Information for**

**Hysteretic Spin Crossover in a Hofmann-type Metal-  
Organic Framework Constructed from the  
[Mo<sup>III</sup>(CN)<sub>7</sub>]<sup>4-</sup> unit**

Fang-Xue Xu,<sup>a</sup> Xin-Yu Zhang,<sup>a</sup> Hai-Yan Wei <sup>\*b</sup> and Xin-Yi Wang <sup>\*a</sup>

<sup>a</sup> State Key Laboratory of Coordination Chemistry, Collaborative Innovation Center of Advanced Microstructures, School of Chemistry and Chemical Engineering, Nanjing University, Nanjing, 210023, China. E-mail: wangxy66@nju.edu.cn.

<sup>b</sup> Jiangsu Key Laboratory of Biofunctional Materials, School of Chemistry and Materials Science, Nanjing Normal University, Nanjing, 210023, China. E-mail: weihaiyan@njnu.edu.cn.

## Contents

|                                                                                                                                                                                                           |   |
|-----------------------------------------------------------------------------------------------------------------------------------------------------------------------------------------------------------|---|
| <b>Figure S1.</b> Thermogravimetric analysis (TGA) curve of <b>1</b> at a heating rate of 10 K/min.<br>.....                                                                                              | 3 |
| <b>Figure S2.</b> The experimental and simulated PXRD patterns for <b>1</b> .....                                                                                                                         | 3 |
| <b>Figure S3.</b> The IR spectra for <b>1</b> at 298 K. ....                                                                                                                                              | 4 |
| <b>Figure S4.</b> The 3D supramolecular network with K <sup>+</sup> ions and H <sub>2</sub> O molecules of <b>1</b><br>viewed along the <i>c</i> axis. ....                                               | 4 |
| <b>Figure S5.</b> The 3D packing structure of <b>1</b> viewed along the <i>b</i> axis. Orange, green, blue,<br>and gray represent Mo, Fe, N, and C atoms, respectively. ....                              | 5 |
| <b>Figure S6.</b> The field-dependent magnetization curve for the crystal sample of <b>1</b><br>measured at 2 K. Insert: magnetic hysteresis loop measured on the crystal sample at 2<br>K.....           | 5 |
| <b>Figure S7.</b> Temperature dependent in-phase ( $\chi'_M$ ) and out-of-phase ( $\chi''_M$ ) signals of the<br>ac susceptibility for <b>1</b> collected under $H_{ac} = 2$ Oe and $H_{dc} = 0$ Oe. .... | 6 |
| <b>Table S1.</b> Selected bond lengths [Å] and angles [°] of complex <b>1</b> . ....                                                                                                                      | 6 |
| <b>Table S2.</b> The hydrogen bonds for <b>1</b> at 193 K.....                                                                                                                                            | 7 |
| <b>Table S3.</b> Continuous Shape Measures (CShMs) calculation for <b>1</b> . ....                                                                                                                        | 8 |

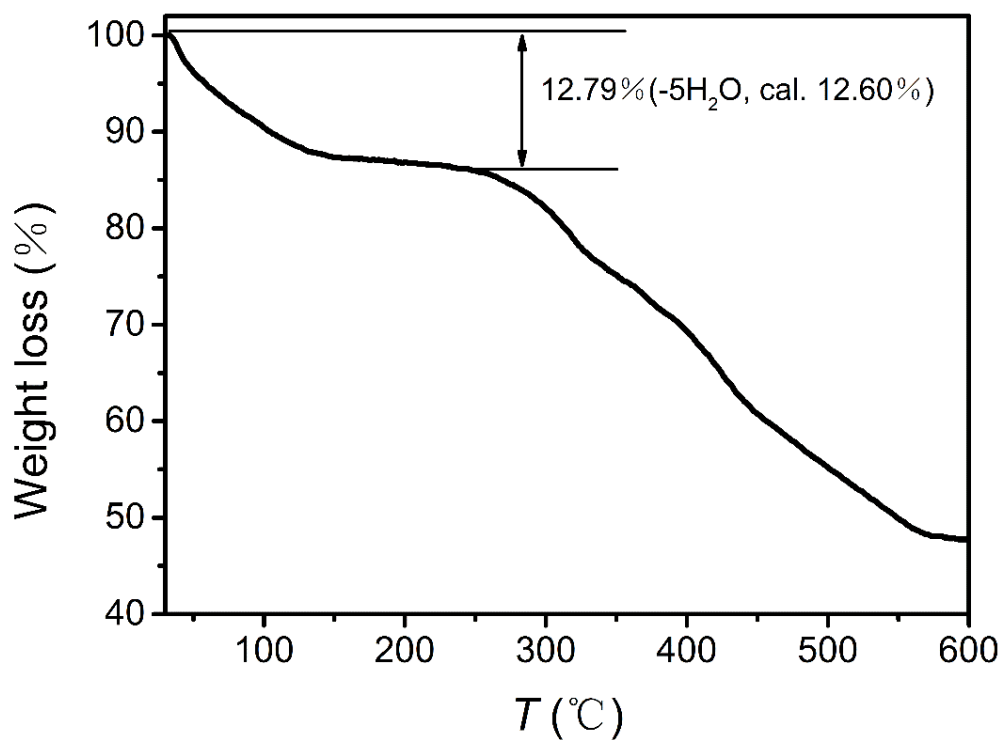

**Figure S1.** Thermogravimetric analysis (TGA) curve of **1** at a heating rate of 10 K/min.

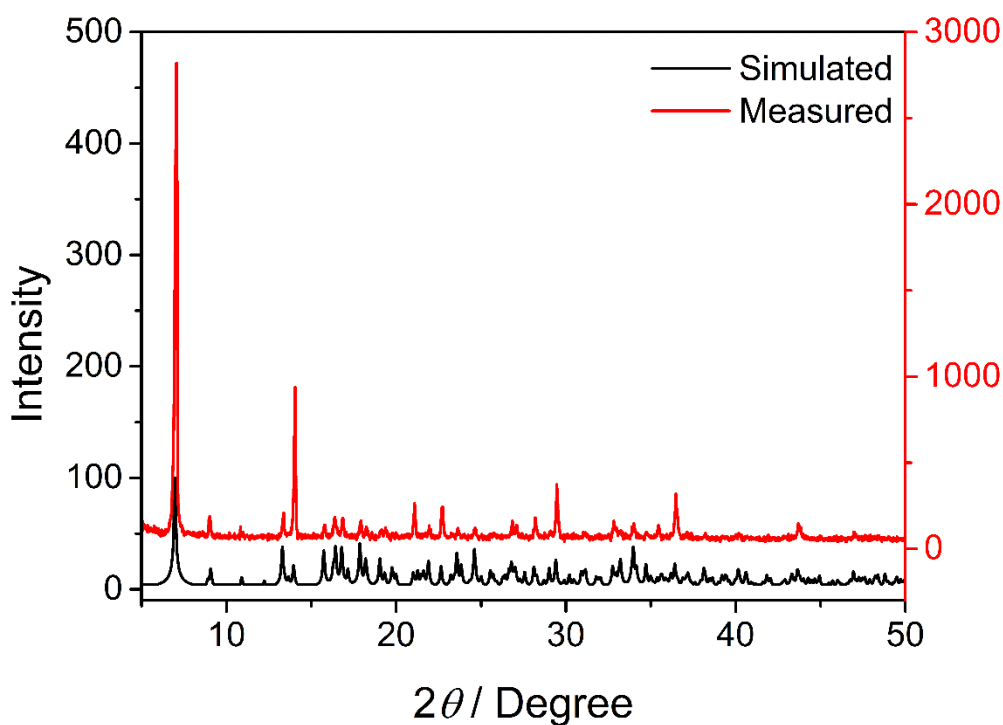

**Figure S2.** The experimental and simulated PXRD patterns for **1**.

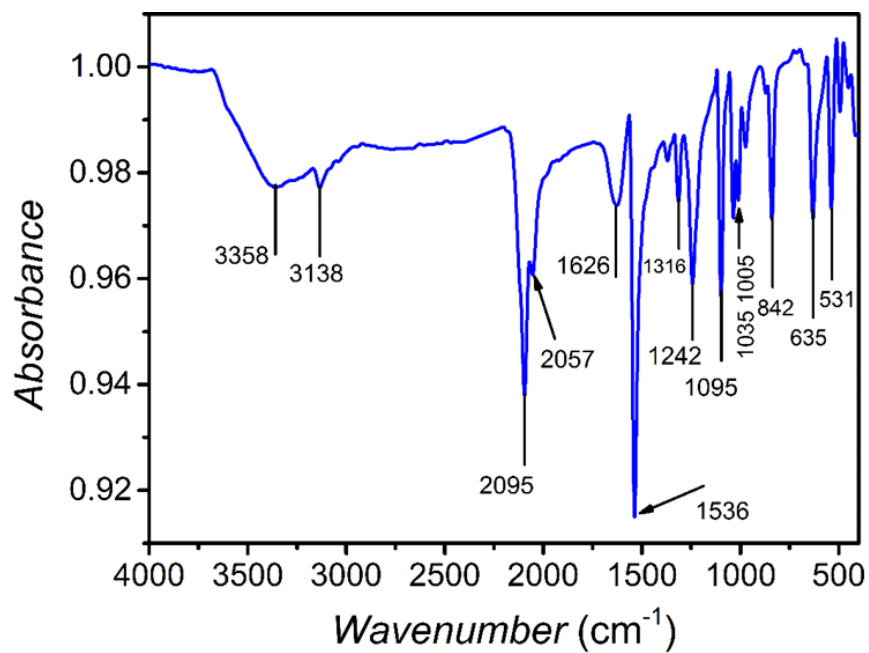

**Figure S3.** The IR spectra for **1** at 298 K.

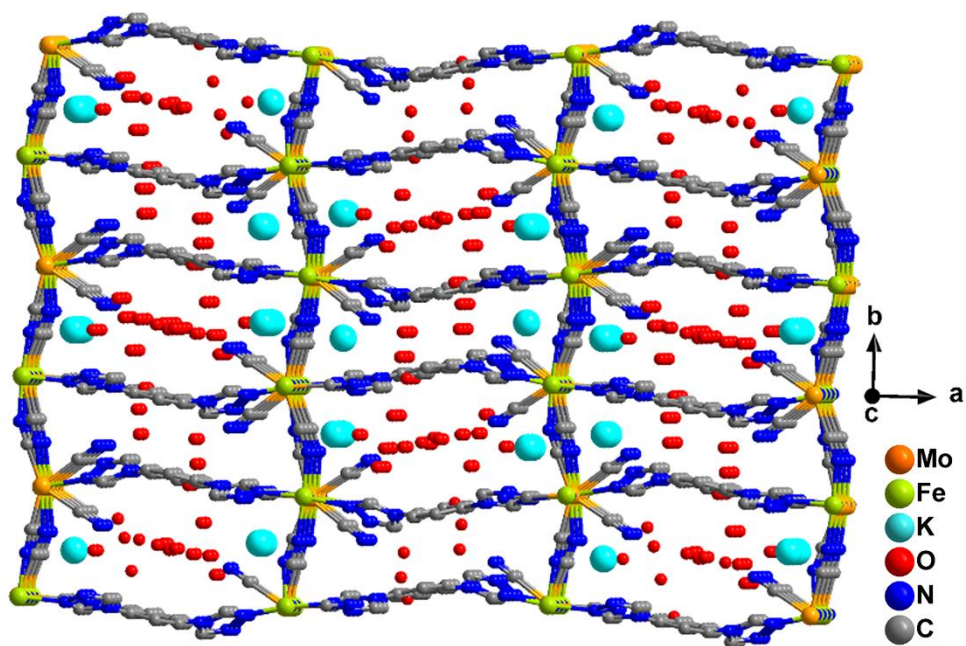

**Figure S4.** The 3D supramolecular network with  $K^+$  ions and  $H_2O$  molecules of **1** viewed along the  $c$  axis.

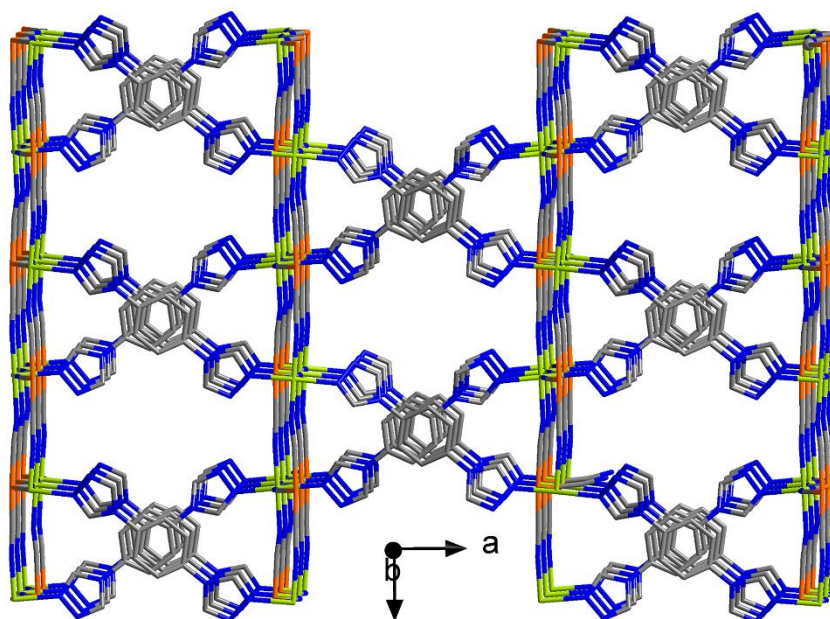

**Figure S5.** The 3D packing structure of **1** viewed along the  $b$  axis. Orange, green, blue, and gray represent Mo, Fe, N, and C atoms, respectively.

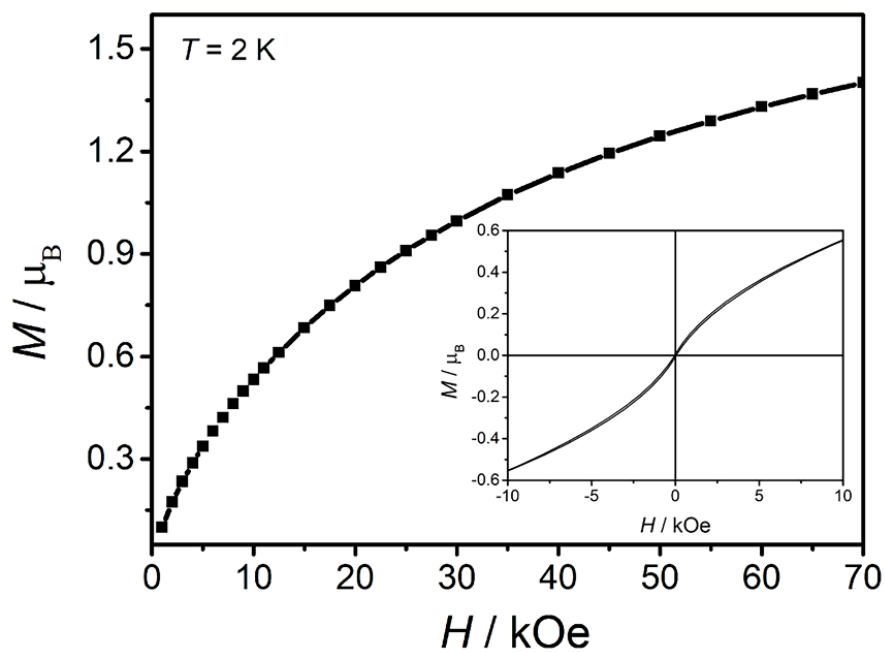

**Figure S6.** The field-dependent magnetization curve for the crystal sample of **1** measured at 2 K. Insert: magnetic hysteresis loop measured on the crystal sample at 2 K.

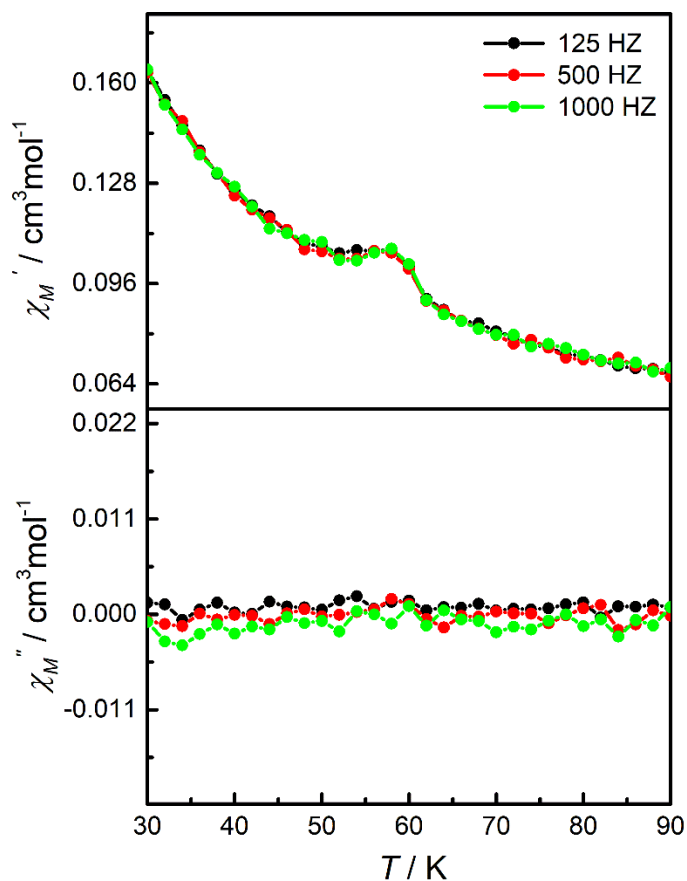

**Figure S7.** Temperature dependent in-phase ( $\chi'_M$ ) and out-of-phase ( $\chi''_M$ ) signals of the ac susceptibility for **1** collected under  $H_{ac} = 2$  Oe and  $H_{dc} = 0$  Oe.

**Table S1.** Selected bond lengths [ $\text{\AA}$ ] and angles [ $^\circ$ ] of complex **1**.

| Bond lengths [ $\text{\AA}$ ] | 193 K     | Bond lengths [ $\text{\AA}$ ] | 100 K     |
|-------------------------------|-----------|-------------------------------|-----------|
| Fe(1)-N(1)                    | 2.127(10) | Fe(1)-N(1)                    | 2.113(11) |
| Fe(1)-N(2) <sup>4</sup>       | 2.144(5)  | Fe(1)-N(2) <sup>4</sup>       | 2.129(6)  |
| Fe(1)-N(4) <sup>3</sup>       | 2.159(5)  | Fe(1)-N(4) <sup>3</sup>       | 2.153(6)  |
| Fe(1)-N(7) <sup>6</sup>       | 2.113(10) | Fe(1)-N(7) <sup>6</sup>       | 2.104(12) |
| Fe(1)-N(9)                    | 2.213(5)  | Fe(1)-N(9)                    | 2.207(6)  |
| Fe(1)-N(13) <sup>5</sup>      | 2.194(5)  | Fe(1)-N(13) <sup>5</sup>      | 2.186(6)  |
| Mo(1)-C(1)                    | 2.134(12) | Mo(1)-C(1)                    | 2.127(14) |
| Mo(1)-C(2)                    | 2.142(5)  | Mo(1)-C(2)                    | 2.137(6)  |
| Mo(1)-C(3)                    | 2.175(8)  | Mo(1)-C(3)                    | 2.190(10) |
| Mo(1)-C(4)                    | 2.147(5)  | Mo(1)-C(4)                    | 2.151(7)  |
| Mo(1)-C(5)                    | 2.159(6)  | Mo(1)-C(5)                    | 2.160(7)  |
| Mo(1)-C(6)                    | 2.156(6)  | Mo(1)-C(6)                    | 2.170(8)  |

|                                                                                                                                                                                                                     |              |                              |              |
|---------------------------------------------------------------------------------------------------------------------------------------------------------------------------------------------------------------------|--------------|------------------------------|--------------|
| Mo(1)-C(7)                                                                                                                                                                                                          | 2.147(13)    | Mo(1)-C(7)                   | 2.143(15)    |
| Mo(1)-Fe(1) (C1N1)                                                                                                                                                                                                  | 5.392        | Mo(1)-Fe(1) (C1N1)           | 5.379        |
| Mo(1)-Fe(1) (C2N2)                                                                                                                                                                                                  | 5.424        | Mo(1)-Fe(1) (C2N2)           | 5.408        |
| Mo(1)-Fe(1) (C4N4)                                                                                                                                                                                                  | 5.361        | Mo(1)-Fe(1) (C4N4)           | 5.345        |
| Mo(1)-Fe(1) (C7N7)                                                                                                                                                                                                  | 5.411        | Mo(1)-Fe(1) (C7N7)           | 5.393        |
| <b>Bond angles [°]</b>                                                                                                                                                                                              | <b>193 K</b> | <b>Bond angles [°]</b>       | <b>100 K</b> |
| C(1)-N(1)-Fe(1)                                                                                                                                                                                                     | 169.2(8)     | C(1)-N(1)-Fe(1)              | 168.9(9)     |
| C(2)-N(2)-Fe(1) <sup>2</sup>                                                                                                                                                                                        | 175.5(5)     | C(2)-N(2)-Fe(1) <sup>2</sup> | 175.5(6)     |
| C(4)-N(4)-Fe(1) <sup>1</sup>                                                                                                                                                                                        | 157.1(4)     | C(4)-N(4)-Fe(1) <sup>1</sup> | 156.6(5)     |
| C(7)-N(7)-Fe(1) <sup>9</sup>                                                                                                                                                                                        | 174.5(7)     | C(7)-N(7)-Fe(1) <sup>9</sup> | 174.4(8)     |
| C(1)-N(1)-Mo(1)                                                                                                                                                                                                     | 174.1(8)     | C(1)-N(1)-Mo(1)              | 174.2(9)     |
| C(2)-N(2)-Mo(1)                                                                                                                                                                                                     | 177.6(7)     | C(2)-N(2)-Mo(1)              | 177.3(8)     |
| C(4)-N(4)-Mo(1)                                                                                                                                                                                                     | 178.5(8)     | C(4)-N(4)-Mo(1)              | 178.6(8)     |
| C(7)-N(7)-Mo(1)                                                                                                                                                                                                     | 177.7(8)     | C(7)-N(7)-Mo(1)              | 177.7(9)     |
| <sup>1</sup> 1/2-X,-1/2+Y,1/2+Z; <sup>2</sup> 1/2-X,1/2+Y,1/2+Z; <sup>3</sup> 1/2-X,1/2+Y,-1/2+Z; <sup>4</sup> -1/2+X,1/2-Y,1/2+Z; <sup>5</sup> 1/2-X,-1/2+Y,1/2+Z; <sup>6</sup> +X,+Y,-1+Z; <sup>9</sup> +X,+Y,1+Z |              |                              |              |

**Table S2.** The hydrogen bonds for **1** at 193 K.

| <b>D-H...A</b>      | <b>d(D-H)/Å</b> | <b>d(H-A)/Å</b> | <b>d(D-A)/Å</b> | <b>&lt;D-H-A/°</b> |
|---------------------|-----------------|-----------------|-----------------|--------------------|
| O(3)-H(3A)...O(4)   | 0.87            | 2.03            | 2.850(14)       | 156                |
| O(3)-H(3B)...N(11)  | 0.87            | 2.47            | 3.331(12)       | 170                |
| O(4)-H(4A)...N(4)   | 0.87            | 2.53            | 3.329(11)       | 153                |
| O(4)-H(4B)...N(6)   | 0.87            | 2.45            | 3.156(17)       | 139                |
| O(5)-H(5B)...N(6)   | 0.87            | 1.91            | 2.769(16)       | 168                |
| C(12)-H(12)...O(2B) | 0.95            | 2.43            | 3.37(2)         | 176                |
| C(16)-H(16)...O(2A) | 0.95            | 2.49            | 3.14(3)         | 126                |

**Table S3.** Continuous Shape Measures (CShMs) calculation for **1**.

| Shape                                                        | CShMs        |              |
|--------------------------------------------------------------|--------------|--------------|
|                                                              | Mo           |              |
|                                                              | 193 K        | 100 K        |
| HP-7 Heptagon ( $D_{7h}$ )                                   | 33.717       | 33.584       |
| HPY-7 Hexagonal pyramid ( $C_{6v}$ )                         | 25.014       | 24.954       |
| <b>PBPY-7 Pentagonal bipyramid (<math>D_{5h}</math>)</b>     | <b>0.236</b> | <b>0.267</b> |
| COC-7 Capped octahedron ( $C_{3v}$ )                         | 7.069        | 6.958        |
| CTPR-7 Capped trigonal prism ( $C_{2v}$ )                    | 5.562        | 5.487        |
| JPBPY-7 Johnson pentagonal bipyramid J13 ( $D_{5h}$ )        | 3.730        | 3.683        |
| JETPY-7 Johnson elongated triangular pyramid J7 ( $C_{3v}$ ) | 23.567       | 23.302       |
|                                                              | Fe           |              |
|                                                              | 193 K        | 100 K        |
| HP-6 Hexagon ( $D_{6h}$ )                                    | 31.475       | 31.560       |
| PPY-6 Pentagonal pyramid ( $C_{5v}$ )                        | 27.166       | 27.320       |
| <b>OC-6 Octahedron (<math>O_h</math>)</b>                    | <b>0.222</b> | <b>0.215</b> |
| TPR-6 Trigonal prism ( $D_{3h}$ )                            | 14.583       | 14.628       |
| JPPY-6 Johnson pentagonal pyramid J2 ( $C_{5v}$ )            | 30.613       | 30.770       |
